# Supplementary material for: A spectroscopic and computational study of a tough MOF with a fragile linker: Ce-UiO-66-ADC
Source: Royal Society of Chemistry journal article supplement (doi:10.1039/c9dt04112e), 2019-11-28
Supplement: c9dt04112e1.pdf [file c9dt04112e1.pdf]

## Supporting information

### **A spectroscopic and computational study of a tough MOF with a fragile linker: Ce-Uio-66-ADC.**

Alessia Airi<sup>a</sup>, Cesare Atzori<sup>a\*</sup>, Francesca Bonino<sup>a</sup>, Alessandro Damin<sup>a</sup>,  
Sigurd Øien-Ødegaard<sup>b</sup>, Erlend Aunan<sup>b</sup> and Silvia Bordiga<sup>\*a,b</sup>

#### List of content:

1. **Materials and methods**
2. **Detection of terminal alkyne**
3. **Structure and morphology description**
4. **DFT calculations**
5. **UV-vis spectroscopy**
6. **Thermal stability**
7. **Specific Surface area**
8. **Raman spectrum analysis and bands assignment**

---

<sup>a</sup> *Department of Chemistry, NIS and INSTM Reference Centre, University of Torino, Via G. Quarello 15, 10135 Torino, Italy*

<sup>b</sup> *Catalysis Section, Department of Chemistry, University of Oslo, P.O. Box 1033, N-0315 Oslo, Norway*

## 1. Materials and methods

### 1.1. Synthesis procedure

Cerium ammonium nitrate  $(\text{NH}_4)_2\text{Ce}(\text{NO}_3)_6$  (98.5%, Sigma-Aldrich) and acetylene dicarboxylic acid  $\text{H}_2\text{ADC}$  (>90.0%, TCI chemicals) were used as purchased.

0.065 g  $\text{H}_2\text{ADC}$  were solubilized in 3.2 mL of dimethylformamide (DMF, Sigma-Aldrich) within a thick-walled glass vial, obtaining a clear solution. Then 1.06 ml of an 0.53M aqueous solution of  $[(\text{NH}_4)_2[\text{Ce}(\text{NO}_3)_6]]$  (previously prepared with 7.305 g in 25 mL of water) was added to the first one. After mixing, the closed vial (with a screw cap) was inserted in a preheated oven at the constant temperature of 90°C and kept in for 15 minutes. After the thermal treatment, the obtained precipitate was separated from liquid phase by centrifuge at 10 000 rpm for 5 minutes then washed with fresh DMF. The solid was washed with acetone and centrifuged for 3 times, then air dried. Same variation to the synthesis have been applied:

- a. **Basic conditions:** triethylamine  $\text{Et}_3\text{N}$  ( $\geq 99\%$ , Sigma-Aldrich) was used in order to increase the yield, the base was added to the DMF  $\text{H}_2\text{ADC}$  solution (1:1 respect to  $\text{H}_2\text{ADC}$  moles), before mixing with  $(\text{NH}_4)_2\text{Ce}(\text{NO}_3)_6$  solution, obtaining a very rapid precipitation. Then the reaction mixture has been inserted in oven at 100°C for 15 minutes. The precipitate product has been isolated by centrifuge and washed as previously described.
- b. **Micro-Waves assisted synthesis:** the same procedure was applied also for testing different sources of heating, introducing the same synthetic mixture in a Biotage Initiator microwave furnace for 15 minutes at 90°C under stirring the best crystalline pattern was obtained (see Figure 1 in the main text).

### 1.2 $^1\text{H-NMR}$ spectroscopy

Digestion NMR analysis was performed on Ce-UiO-66-ADC in order to characterize any residual solvents in the pores. The MOF (200 mg) was digested in 1M NaOD in  $\text{D}_2\text{O}$  for 10 minutes under shaking before centrifuged to separate the insoluble  $\text{Ce}(\text{OD})_4$  from the mother liquor containing the soluble organic species. The mother liquor was analyzed using NMR spectroscopy (Bruker AVII 400, 128 scans,  $d_1=5$  sec). The NMR analysis confirmed the presence of DMF (both from DMF itself, and from its decomposition products: formate and dimethylamine). No linker was observed, as expected as it contains no protons.

### 1.3. Electron Microscopies

**SEM:** the micrographs were collected using a Zeiss Evo 50 xvp microscope equipped with a  $\text{LaB}_6$  crystal electron source working at 20 kV of accelerating potential. The sample had been previously coated in gold by sputter deposition.

**TEM:** the micrographs were collected using a TEM JEOL JEM 3010 UHR microscope equipped with a  $\text{LaB}_6$  electron source working at 300 kV of accelerating potential and a EDS OXFORD energy dispersion detector (0,17 nm of theoretical resolution). The images have been collected by a CCD

camera Gatan, Model 894 US1000 (2k x 2k). The sample has been prepared depositing a small amount of powder over a 200 mesh lacey carbon copper screen.

#### **1.4. PXRD**

The sample was placed in a 0.7 mm  $\emptyset$  glass capillary, and PXRD patterns in the range of  $2\theta = 4^\circ$ - $70^\circ$  were acquired over 24 hours on a Bruker D8 Advance diffractometer with Cu K- $\alpha$  radiation.

**VTXRD:** Diffraction patterns have been collected with a PW3050/60 X'Pert PRO MPD diffractometer, working in Bragg-Brentano geometry, using Cu anode.

Non-ambient chamber Anton Paar XRK900 with Be windows was used to collect the PXRD data in dynamic vacuum, with ramp rate of  $2^\circ\text{C}/\text{min}$ . Each  $2\theta$  scan was collected every  $10^\circ\text{C}$ , rising in temperature from RT to  $190^\circ\text{C}$ .

#### **1.5. DR-UV-vis spectroscopy**

Ce-UiO-66-ADC spectra have been collected with a Varian Cary 5000 UV-vis-NIR spectrophotometer working in diffuse reflectance mode in the 200-2500 nm, with resolution of 1 nm.

H2ADC and  $[(\text{NH}_4)_2[\text{Ce}(\text{NO}_3)_6]]$  aqueous solutions spectra have been collected in transmission mode in spectral range of 200-800 nm with a resolution of 1 nm.

#### **1.6. Thermo Gravimetric Analysis**

The thermo-gravimetric analysis (TGA) has been conducted using a TA Instruments Q600 programmed for rising  $3^\circ\text{C}/\text{min}$  from RT to  $700^\circ\text{C}$  in both air and  $\text{N}_2$  atmosphere (100 mL/min flows), on about 10 mg of each sample in an alumina crucible.

#### **1.7. 77K $\text{N}_2$ adsorption**

Adsorption measurements were performed on a Micromeritics ASAP 2020 apparatus working at 77K with about 40 mg of sample.

#### **1.8. FT-IR spectroscopy**

Infra-red spectra have been collected by Thermo Scientific Nicolet 6700 FTIR spectrometer equipped with a HgCdTe detector in transmission mode using a self-supporting pellet in the range  $400$ - $4000\text{ cm}^{-1}$  with a resolution of  $2\text{ cm}^{-1}$ .

#### **1.9. Raman Spectroscopy**

Raman spectra of a self-supporting pellet of sample activated at different temperatures, were collected with a Renishaw InVia Raman microscope working with a 785 nm laser diode and a 20X objective, accumulating for 20 seconds with 1 mW laser power in the  $3200$ - $100\text{ cm}^{-1}$  Raman shift range. Spectra of powdered material were collected using 785 nm, 514 nm ( $\text{Ar}^+$  laser) and 442 nm (He-Cd lasers) exciting laser lines: spectra result from 10 acquisitions each one of 20 seconds. Power at the sample was maintained below 1 mW. In order to reduce the risk of thermal degradation, a special setup providing the sample rotation under the laser beam has been adopted.<sup>1</sup>

## 2. Detection of terminal alkyne

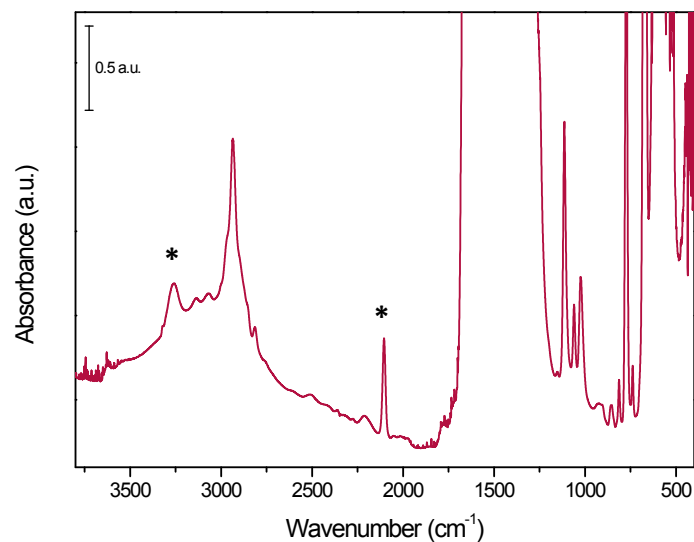

**Figure S1 FT-IR spectrum of 90°C in vacuum outgassed material.**

The IR spectrum was collected on the activated sample (high vacuum overnight at 90°C) in order to minimize interferences due to adsorbed molecules. The spectrum is characterized by the presence of a signal at 3260 cm<sup>-1</sup> and a strong sharp band at 2107 cm<sup>-1</sup> which can be easily attributed to a terminal alkyne, compatible with the decarboxylation product of the linker, see Scheme 1 in main text.

### 3. Structure and morphology description

#### 3.1. Influence of Et<sub>3</sub>N. PXRD

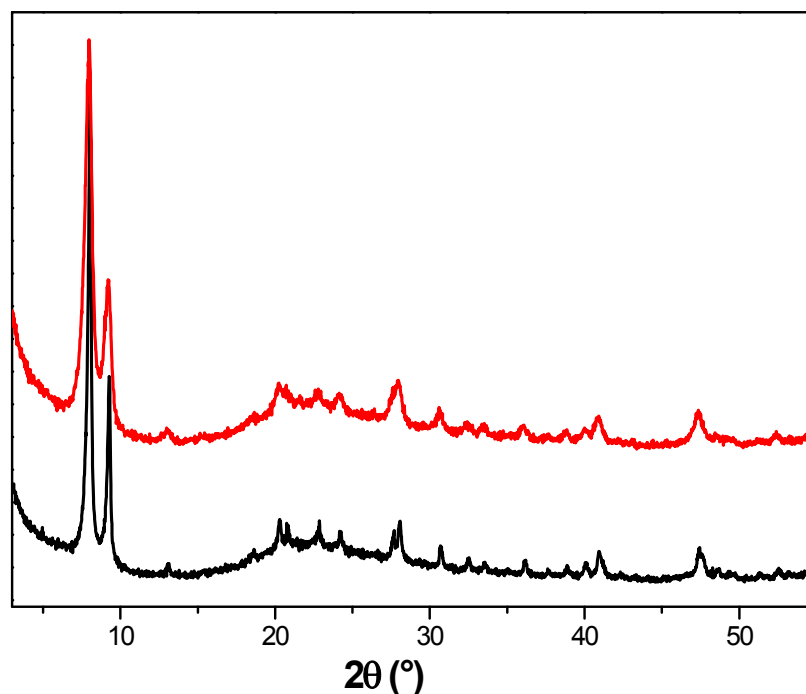

**Figure S2. PXRD patterns of Ce-UiO-66-ADC. Sample obtained without the use of Et<sub>3</sub>N (black line); sample obtained in presence of Et<sub>3</sub>N (red line).**

The two materials present the same pattern. None significant differences are visible except for the width of reflexes, due to the faster precipitation in presence of Et<sub>3</sub>N, which produce smaller crystal domains.

By the comparison of the PXRD patterns it is possible to affirm that the different synthetic procedures applied result to produce the same crystal phase, denoted as Ce-UiO-66-ADC.

### 3.2. SEM microscopy

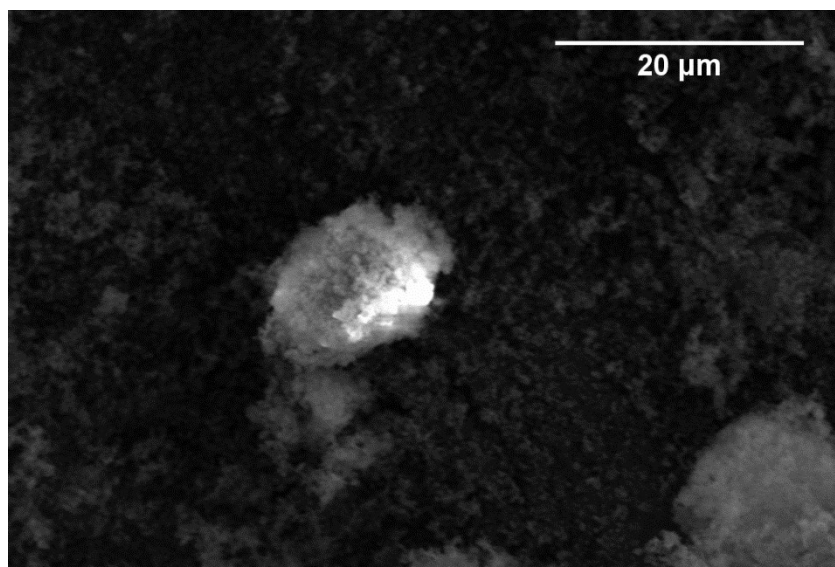

*Figure S3. SEM images of Ce-UiO-66-ADC (synthesized in basic conditions).*

### 3.3. TEM microscopy

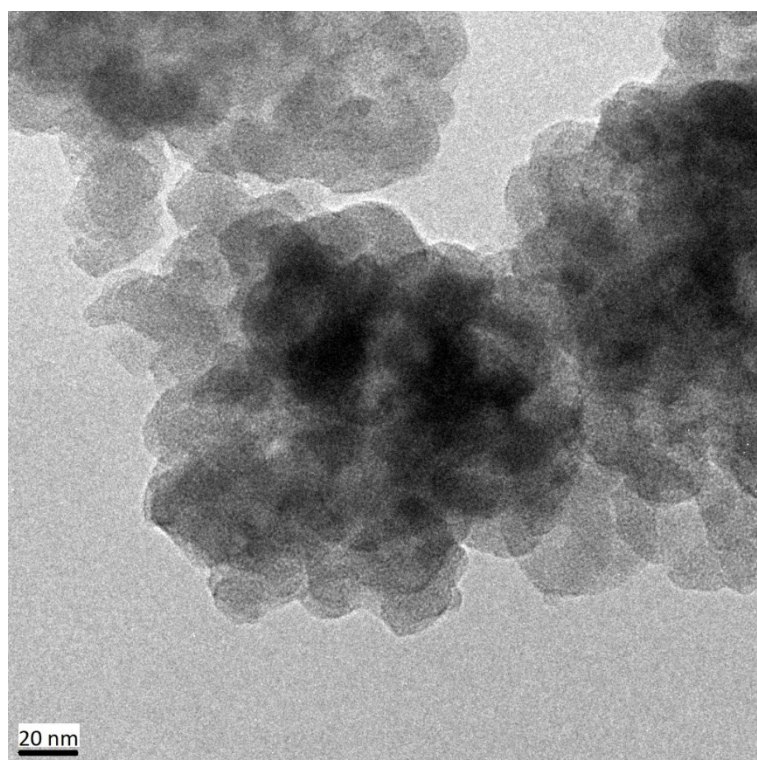

*Figure S4. TEM images of Ce-UiO-66-ADC (synthesized in basic conditions).*

### 3.4. Structure

Using cell parameters obtained from a Pawley fit (FM-3m,  $a = 19.11 \text{ \AA}$ ), a model based on 12-connected clusters, containing 6 Ce atoms, was constructed in Materials Studio v8 (Biovia, 2019), and geometrically optimized with the Forcite program. This model was used in a Rietveld refinement (using  $2\theta 4^\circ\text{-}65^\circ$ ) where the Ce position was allowed to refine, leading to the structure reported herein.

This is the output file of the refinement:

**Chemical formula:**  $[\text{Ce}_6\text{O}_4(\text{OH})_4(\text{ADC})_6]$

#### R-Values

Rexp : 6.78      Rwp : 9.67      Rp : 7.38      GOF : 1.43  
Rexp` : 16.65      Rwp` : 23.75      Rp` : 24.03      DW : 1.03

#### Quantitative Analysis - Rietveld

Phase 1 : ""      100.000 %

#### Background

|                                   |    |           |
|-----------------------------------|----|-----------|
| Chebyshev polynomial, Coefficient | 0  | 188.3758  |
|                                   | 1  | -140.7667 |
|                                   | 2  | 100.135   |
|                                   | 3  | -54.67057 |
|                                   | 4  | 40.87468  |
|                                   | 5  | -37.97169 |
|                                   | 6  | 30.43907  |
|                                   | 7  | -4.02601  |
|                                   | 8  | -11.60408 |
|                                   | 9  | 10.07483  |
|                                   | 10 | -9.637173 |

#### Instrument

|                         |          |
|-------------------------|----------|
| Primary radius (mm)     | 166      |
| Secondary radius (mm)   | 209      |
| Simple axial model (mm) | 7.688171 |

#### Corrections

|            |            |
|------------|------------|
| Zero error | 0.01658058 |
| LP Factor  | 27.3       |

#### Structure 1

|                                |              |
|--------------------------------|--------------|
| Phase name                     |              |
| R-Bragg                        | 3.525        |
| Spacegroup                     | FM-3M        |
| Scale                          | 3.03507e-007 |
| Cell Mass                      | 6563.734     |
| Cell Volume ( $\text{\AA}^3$ ) | 6978.94642   |
| Wt% - Rietveld                 | 100.000      |
| Double-Voigt Approach          |              |
| Cry size Lorentzian            | 108.1        |
| k: 1 LVol-IB (nm)              | 68.847       |
| k: 0.89 LVol-FWHM (nm)         | 96.248       |

Strain  
 Strain L 1.188662  
 Strain G 0.0001  
 e0 0.00259  
 Crystal Linear Absorption Coeff. (1/cm) 300.588  
 Crystal Density (g/cm<sup>3</sup>) 1.562  
 Lattice parameters  
 a (Å) 19.1101144

| Site | Np | x       | y       | z       | Atom | Occ | Beq |
|------|----|---------|---------|---------|------|-----|-----|
| Ce1  | 24 | 0.13662 | 0.00000 | 0.00000 | Ce   | 1   | 0   |
| O2   | 32 | 0.06392 | 0.06392 | 0.06392 | O    | 1   | 0   |
| C3   | 48 | 0.16710 | 0.16710 | 0.00000 | C    | 1   | 0   |
| C4   | 48 | 0.22598 | 0.22598 | 0.00000 | C    | 1   | 0   |
| O5   | 96 | 0.18582 | 0.10019 | 0.00000 | O    | 1   | 0   |

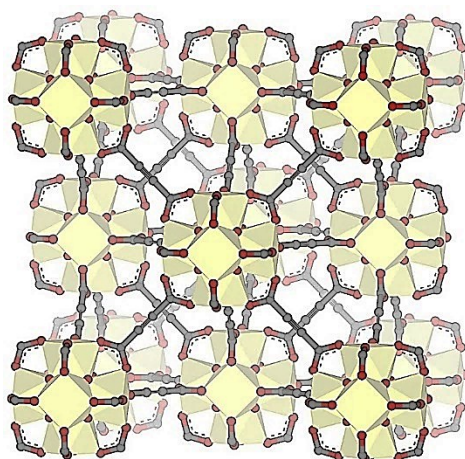

**Figure S5. Elementary cell of Ce-Uio-66-ADC**



#### 4. DFT calculations

Periodic DFT<sup>2</sup> based calculations were performed by exploiting the hybrid B3LYP<sup>3,4</sup> functional and the empirical D3(BJ)<sup>5-7</sup> scheme for the description of dispersive interactions and including the Axilrod-Teller-Muto type three-body term. In the whole set of calculations, the CRYSTAL software<sup>8,9</sup> package was employed: this allows a complete treatment of periodic systems through the use of atom-centred linear combinations of Gaussian type functions for the description of atomic orbitals (basis set). Basis set adopted in present calculations is below described:

**a)** Ce inner electrons (28) were replaced by an effective core potential (ECP), the remaining 30 electrons being explicitly treated through a (10sp7d8f)/[4sp2d3f] basis set. The same scheme was already employed in Ref<sup>[10]</sup> for Ce description in CeO<sub>2</sub> and Ce<sub>2</sub>O<sub>3</sub> systems. See also <http://www.crystal.unito.it/basis-sets.php>.

**b)** O and C atoms were described through a (8s6sp2d)/[1s3sp2d] and (6s5sp2d)/[1s3sp2d] all-electron basis sets respectively. They were obtained by ones employed in Ref<sup>[11]</sup>, simply by splitting the original d shell through an even tempered recipe. For their full description see also Table S2.

**c)** For H atoms the adopted all electron basis set was a (7s1p)/[3s1p] one already adopted in Ref<sup>[12]</sup>. See also <http://www.crystal.unito.it/basis-sets.php>.

Numerical accuracy in energy calculation were determined by setting thresholds for mono- and bi-electronic integral to {1188836} through the keyword (TOLINTEG). Shrinking factor parameter (keyword SHRINK), determining the k-points sampling in the reciprocal space, was set to 3 (corresponding to 4 irreducible k points). The defaults values for all the unreported computational parameters concerning the structure optimization, frequency and the associated Raman intensities calculation were used.

| O (8s6sp2d)/[1s3sp2d] basis set | C (6s5sp2d)/[1s3sp2d] basis set |
|---------------------------------|---------------------------------|
| 8 6                             | 6 6                             |
| <b>0 0 8 2 1.0</b>              | <b>0 0 6 2 1.0</b>              |
| 8020. 0.001080                  | 4563.24000 0.00196665           |
| 1338. 0.008040                  | 682.02400 0.01523060            |
| 255.4 0.053240                  | 154.97300 0.07612690            |
| 69.22 0.168100                  | 44.45530 0.26080100             |
| 23.90 0.358100                  | 13.02900 0.61646200             |
| 9.264 0.385500                  | 1.82773 0.22100000              |
| 3.851 0.146800                  | <b>0 1 3 4 1.0</b>              |
| 1.212 0.072800                  | 20.96420 0.11466000 0.04024870  |
| <b>0 1 4 6 1.0</b>              | 4.80331 0.91999900 0.23759400   |
| 49.43 -0.008830 0.009580        | 1.45933 -0.00303068 0.81585400  |
| 10.47 -0.091500 0.069600        | <b>0 1 1 0 1.0</b>              |
| 3.235 -0.040200 0.206500        | 0.483456 1. 1.                  |
| 1.217 0.379000 0.347000         | <b>0 1 1 0 1.0</b>              |
| <b>0 1 1 0 1.0</b>              | 0.145585 1. 1.                  |
| 0.486 1. 1.                     | <b>0 3 1 0 1.0</b>              |
| <b>0 1 1 0 1.0</b>              | 1.6 1.                          |
| 0.1925 1. 1.                    | <b>0 3 1 0 1.</b>               |
| <b>0 3 1 0 1.</b>               | 0.4 1.                          |
| 1.6 1.                          |                                 |
| <b>0 3 1 0 1.</b>               |                                 |
| 0.4 1.                          |                                 |

**Table S1: Gaussian basis sets (reported in the CRYSTAL code format) adopted in present calculations for the description of O and C atoms.**

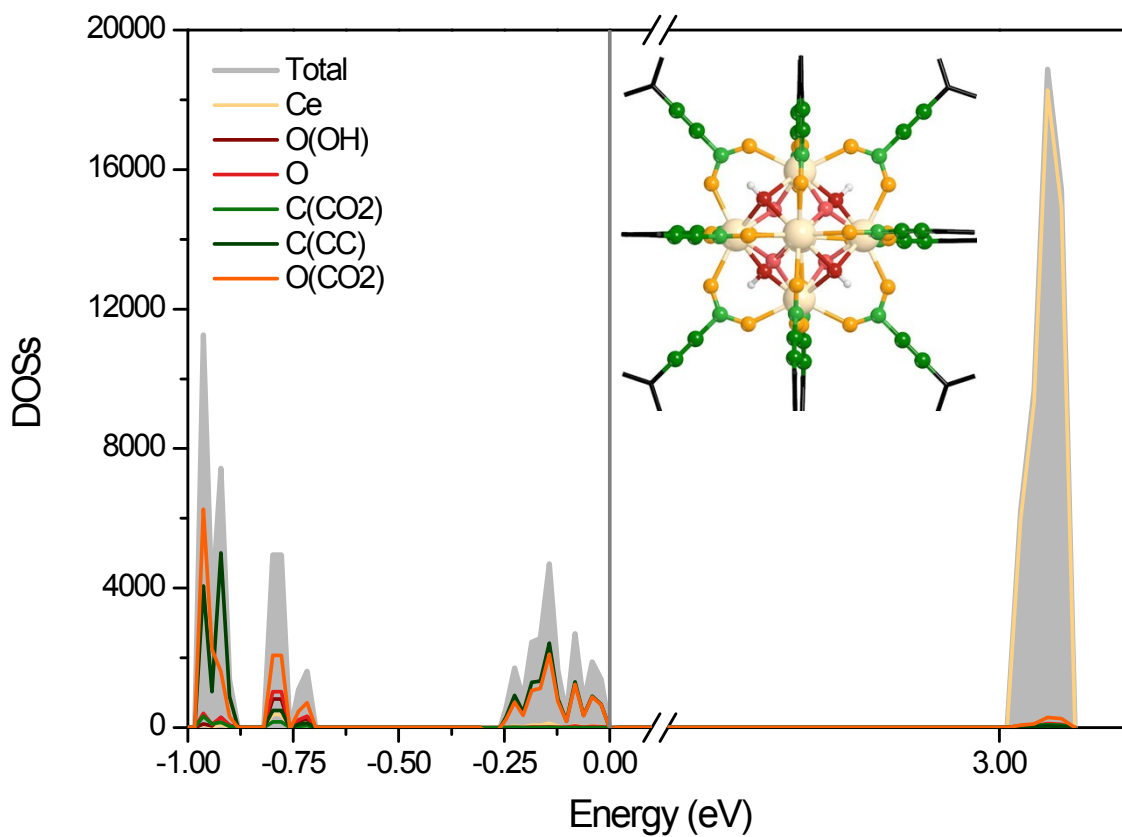

**Figure S6.** Total density of states (filled grey curve) computed on optimized Ce-UiO-66-ADC structure. Contributions from different atomic species (solid lines) constituting the repeating unit of Ce-UiO-66-ADC (see inset for a graphical representation) are also reported for the sake of comparison.

## 5. UV-vis spectroscopy

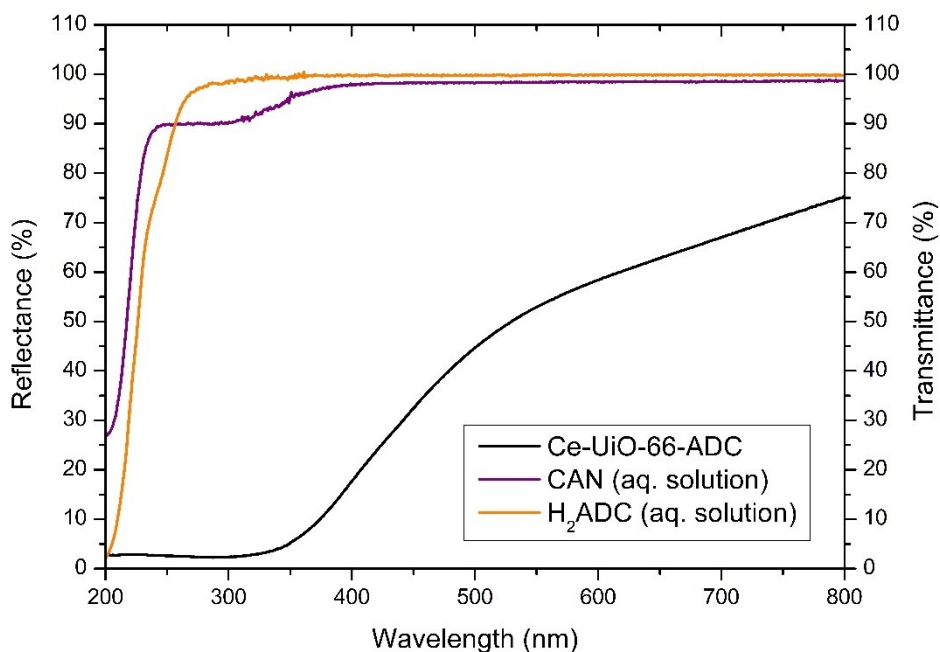

**Figure S7. DR-UV-vis spectrum of Ce-UiO-66-ADC (black), compared with transmission UV-vis spectra of the solubilized precursors H<sub>2</sub>ADC (orange) and Cerium ammonium nitrate CAN (violet).**

As shown in Figure S7, the Ce-UiO-66-ADC UV-vis spectrum results to be more complex than the simply sum of the two spectra of its precursors, suggesting a deep change in the electronic structure with the formation of the solid.

## 6. Thermal stability

### 6.1. VTXRD

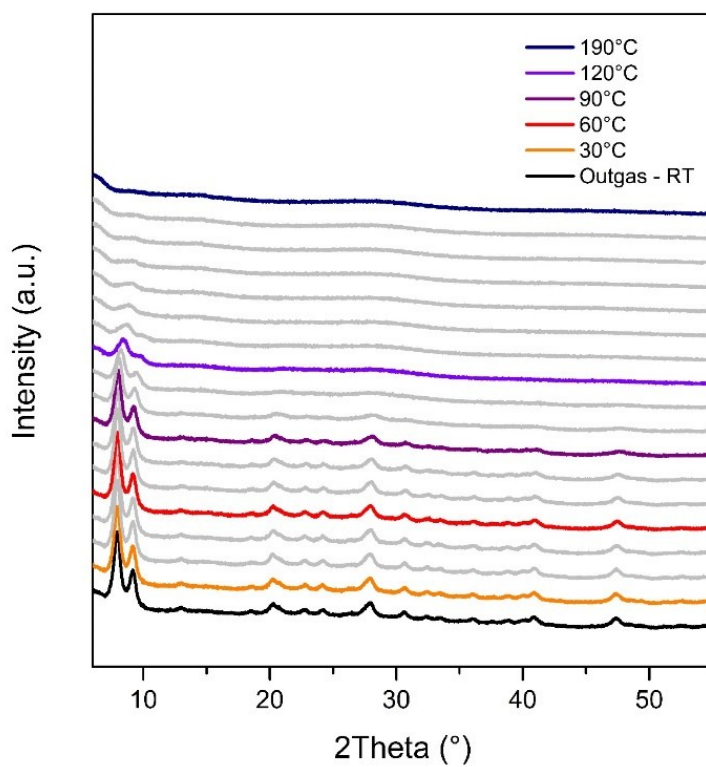

**Figure S8.** Ce-Uio-66-ADC PXRD patterns from RT (bottom) to 190°C (top) rising 10° per step. The colours underline the temperature selected for activation in following measurements (same colour code).

## 6.2. TGA

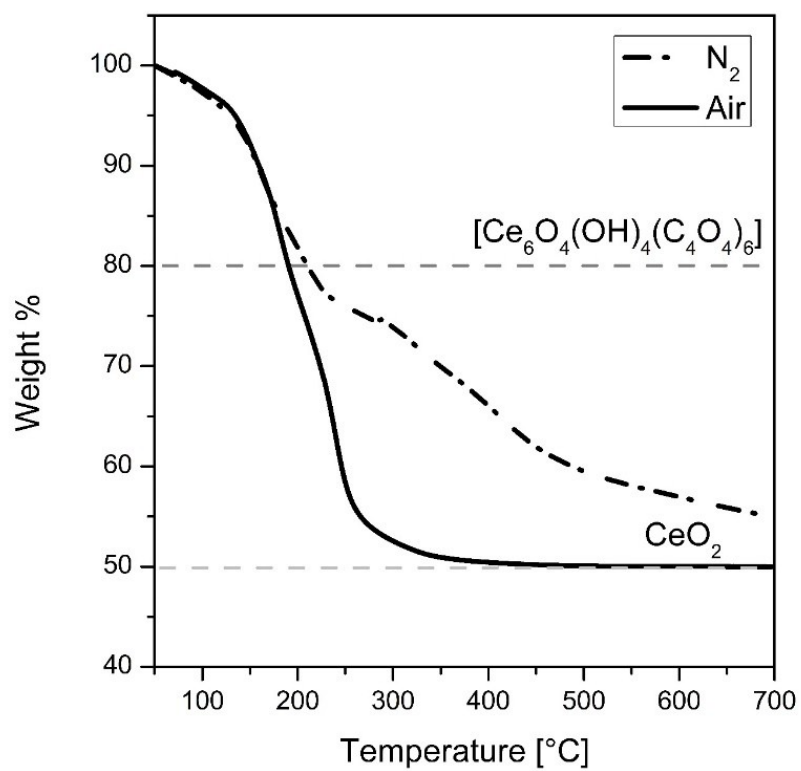

**Figure S9.** TGA curves of Ce-UiO-66-ADC, under dry air (solid line) and in N<sub>2</sub> (dot line) flux.

## 7. Specific surface area

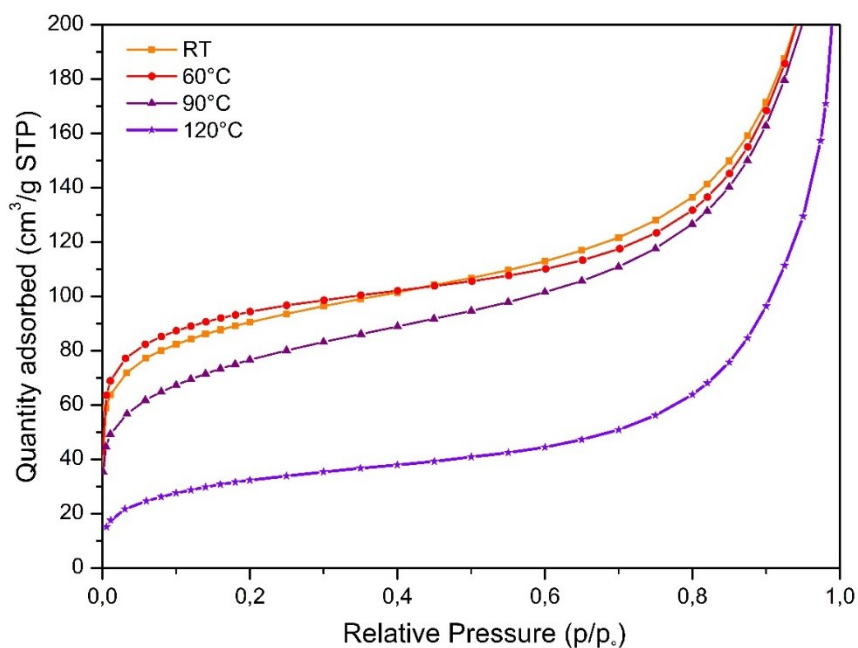

**Figure S10.** *N<sub>2</sub> adsorption 77K isotherms for sample activated at different temperatures.*

| Outgassing Temperature (°C) | Langmuir Surface area (m <sup>2</sup> /g) | B.E.T. surface area (m <sup>2</sup> /g) |
|-----------------------------|-------------------------------------------|-----------------------------------------|
| RT                          | 425 ± 5                                   | 326 ± 2                                 |
| 60                          | 437 ± 4                                   | 345 ± 2                                 |
| 90                          | 371 ± 6                                   | 273 ± 2                                 |
| 120                         | 163 ± 3                                   | 118 ± 1                                 |

**Table S2.** *Specific surface area values after in vacuum thermal outgassing.*

### Theoretical Specific Surface Area:

N<sub>2</sub> accessible surface area was estimated using both a crude geometrical summation of the Connolly surface, and a simulated adsorption isotherm calculated using the Sorption module in Materials Studio. Surface calculation gave a result of 1131 m<sup>2</sup>/g, whereas the simulated sorption isotherm gave a BET surface area of 889 m<sup>2</sup>/g using the pressure range of  $p/p_0 = 0.00031 - 0.01755$ .

## 8. Raman spectrum analysis and bands assignment

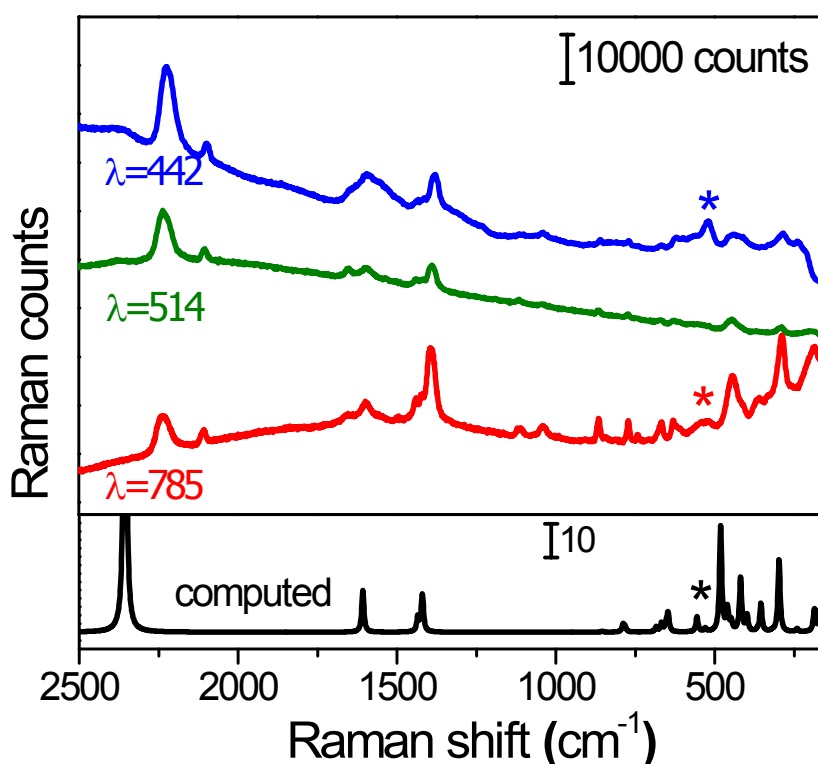

**Figure S11.** Raman spectra collected with different wavelength of irradiation ( blue line: 442 nm, green: 514 nm, red: 785nm) in the Raman shift range between 2500 and 250 cm<sup>-1</sup>, compared with the computed one (black line).

The Raman spectrum of Ce-UiO-66-ADC is characterized by three main regions, starting from higher wavenumbers: 2200-2100 cm<sup>-1</sup> C≡C stretching region; 1600-1380 cm<sup>-1</sup> carboxylate stretching region; below 1000 cm<sup>-1</sup> are present the complex modes of the metal-oxide cluster. The Raman spectrum collected with the  $\lambda=785$  nm laser shows also the fingerprints of DMF: maxima observed at 773, 864 ,1030, 1120 cm<sup>-1</sup>.

The complete assignation of the Raman active modes of Ce-UiO-66-ADC is reported in Table S3.



| Experimental<br>(cm <sup>-1</sup> ) | Computed<br>(cm <sup>-1</sup> ) | Moiety           | Description                                              |
|-------------------------------------|---------------------------------|------------------|----------------------------------------------------------|
| 2235                                | 2337                            | linker           | R-(C≡C)-R stretching                                     |
| 2107                                | -                               | defective linker | R-(C≡C)-H stretching                                     |
| 1594                                | 1592                            | linker           | (COO <sup>-</sup> ) asymm stretching                     |
| 1391                                | 1416                            | linker           | (COO <sup>-</sup> ) symm stretching                      |
| 741                                 | 802                             | linker           | COO <sup>-</sup> out of plane                            |
| 665                                 | 656                             | cluster+ linker  | O-H bending + C-(COO <sup>-</sup> ) bending              |
| 622                                 | 644                             | cluster+ linker  | O-H bending + COO <sup>-</sup> bending                   |
| 521                                 | 556                             | cluster          | Ce-O                                                     |
| 440                                 | 482                             | cluster + linker | Ce-O(COO <sup>-</sup> ) symm stretching                  |
| 418                                 | 412                             | cluster          | Ce-O breathing symm                                      |
| 359                                 | 355                             | cluster + linker | Ce-O breathing asym + out of plane C-(COO <sup>-</sup> ) |
| 285                                 | 302                             | cluster + linker | Ce-O(COO <sup>-</sup> ) asymm                            |
| 205-150                             | 184,162                         | cluster + linker | Coupled complex modes of Ce-O(COO <sup>-</sup> )         |

**Table S3. Frequencies of the principal Raman active vibrational modes of Ce-UiO-66-ADC.**

## REFERENCES:

- 1 M. Signorile, F. Bonino, A. Damin and S. Bordiga, *Top. Catal.*, 2018, **61**, 1491–1498.
- 2 P. Hohenberg and W. Kohn, *Phys. Rev.*, 1964, **136**, B864–B871.
- 3 A. D. Becke, *J. Chem. Phys.*, 1993, **98**, 1372–1377.
- 4 C. Lee, W. Yang and R. G. Parr, *Phys. Rev. B*, 1988, **37**, 785–789.
- 5 S. Grimme, J. Antony, S. Ehrlich and H. Krieg, *J. Chem. Phys.*, 2010, **132**, 154104.
- 6 S. Grimme, S. Ehrlich and L. Goerigk, *J. Comput. Chem.*, 2011, **32**, 1456–1465.
- 7 S. Grimme, A. Hansen, J. G. Brandenburg and C. Bannwarth, *Chem. Rev.*, 2016, **116**, 5105–5154.
- 8 R. Dovesi, A. Erba, R. Orlando, C. M. Zicovich-Wilson, B. Civalleri, L. Maschio, M. Rérat, S. Casassa, J. Baima, S. Salustro and B. Kirtman, *Wiley Interdiscip. Rev. Comput. Mol. Sci.*, 2018, **8**, 1–36.
- 9 R. Dovesi, V.R. Saunders, C. Roetti, R. Orlando, C. M. Zicovich-Wilson, F. Pascale, B. Civalleri, K. Doll, N.M. Harrison, I.J. Bush, Ph. D’Arco, M. Llunel, M. Causà, Y. Noel, L. Maschio, A. Erba, M. Rérat, S. Casassa, *CRYSTAL17 User’s Manual*, 2018.
- 10 J. Graciani, A. M. Márquez, J. J. Plata, Y. Ortega, N. C. Hernández, A. Meyer, C. M. Zicovich-Wilson and J. F. Sanz, *J. Chem. Theory Comput.*, 2011, **7**, 56–65.
- 11 L. Valenzano, B. Civalleri, S. Chavan, S. Bordiga, M. H. Nilsen, S. Jakobsen, K. P. Lillerud and C. Lamberti, *Chem. Mater.*, 2011, **23**, 1700–1718.
- 12 R. Dovesi, C. Ermondi, E. Ferrero, C. Pisani and C. Roetti, *Phys. Rev. B*, 1984, **29**, 3591–3600.
